# Supplementary material for: The hypersaline synthesis of titania: from powders to aerogels
Source: Royal Society of Chemistry journal article supplement (doi:10.1039/c4ra13573c), 2015-01-01
Supplement: c4ra13573c1.pdf [file c4ra13573c1.pdf]

## The hypersaline synthesis of titania: From powders to aerogels

Roberto Nisticò\*, Giuliana Magnacca

University of Torino, Department of Chemistry and NIS Centre, Via P. Giuria 7, 10125 Torino, Italy

\*Corresponding author. E-mail: [roberto.nistico@unito.it](mailto:roberto.nistico@unito.it), Ph.: +39-011-6707533, Fax: +39-011-6707855

### ELECTRONIC SUPPORTING INFORMATION

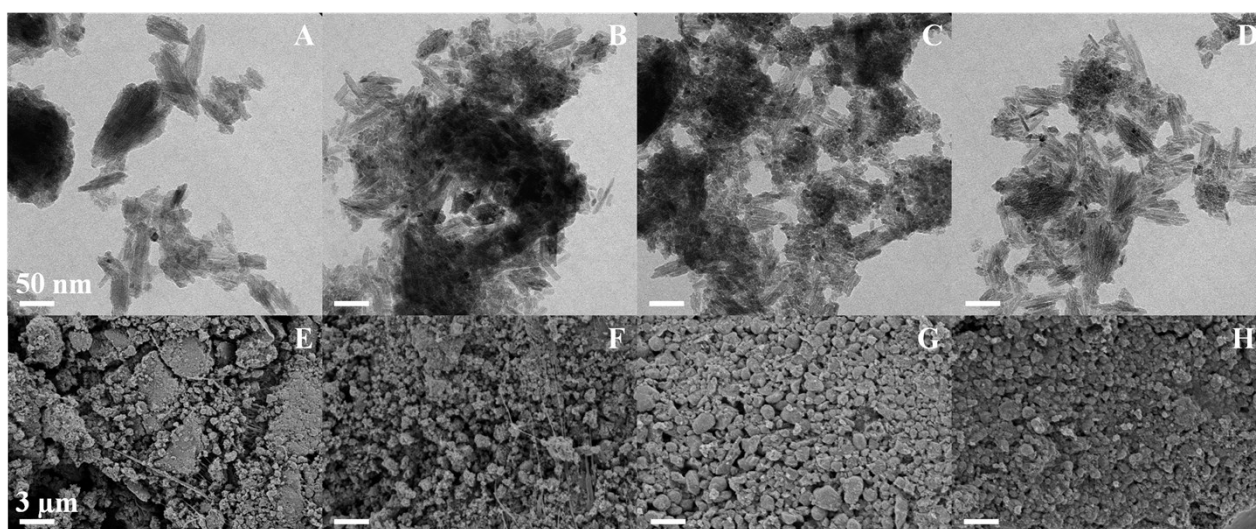

**Fig. S1.** TEM (upper row) and SEM pictures (lower row) of salt-templated titania powders. From left to right: SaTi-Na-0.5 (A, E), SaTi-Na-1 (B, F), SaTi-Na-3 (C, G) and SaTi-K-2 (D, H).

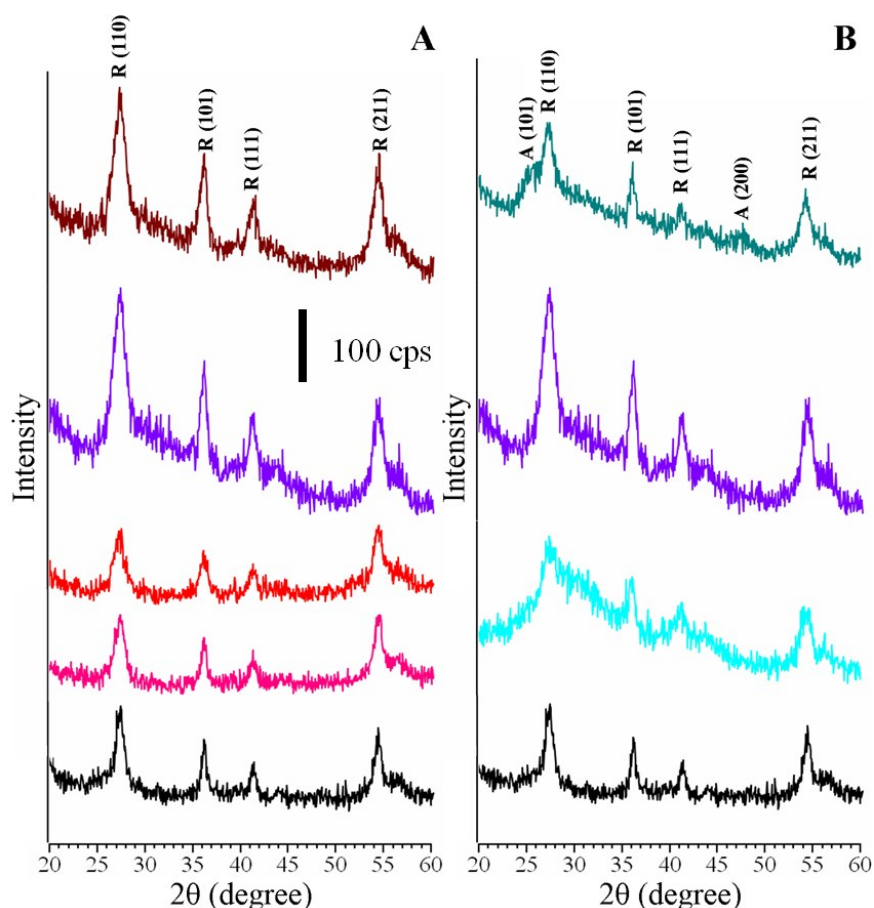

**Fig. S2.** WAXS patterns of the washed titania powders at varying amount (A, left) and nature (B, right) of the salt-porogen: SaTi-0-0 (black), SaTi-Na-0.5 (pink), SaTi-Na-1 (red), SaTi-Na-2 (violet), SaTi-Na-3 (brown), SaTi-K-2 (light cyan), SaTi-Li-2 (dark cyan).

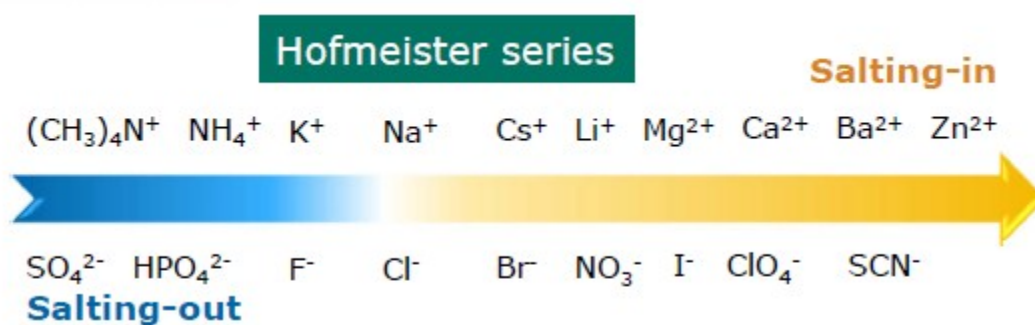

**Scheme S1.** Hofmeister series of the most commonly used inorganic ions. The arrow indicates the transition from salting-out ions (blue branch) to salting-in ions (yellow branch), with strong salting-out ions on the left and strong salting-in ions on the right.

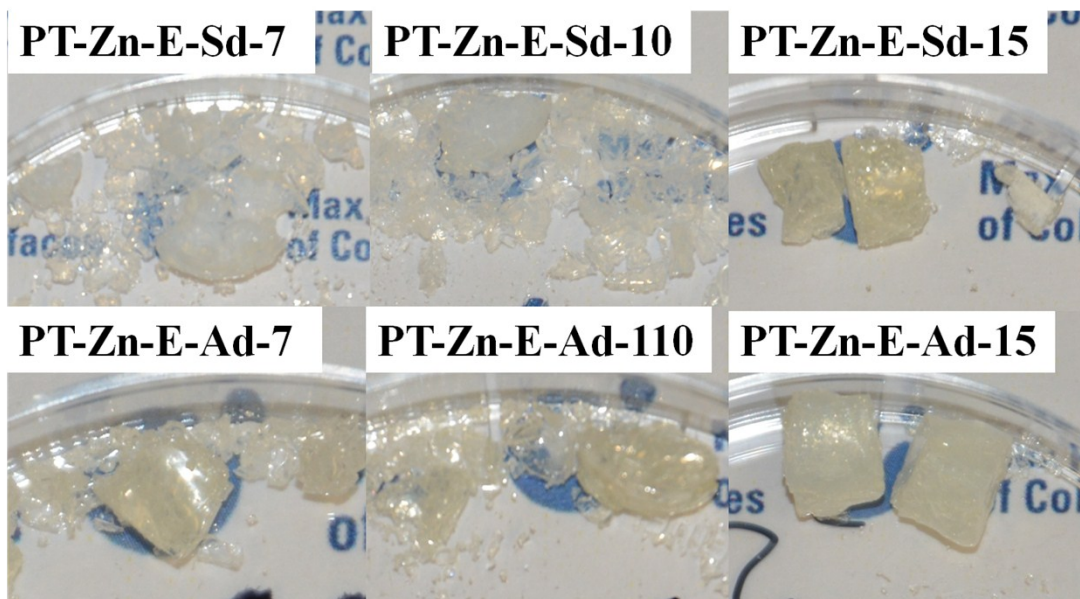

**Fig. S3.** Images of Zn-templated titania CO<sub>2</sub> supercritical dried (top) and RT ambient pressure air dried (bottom) obtained in ethanol.

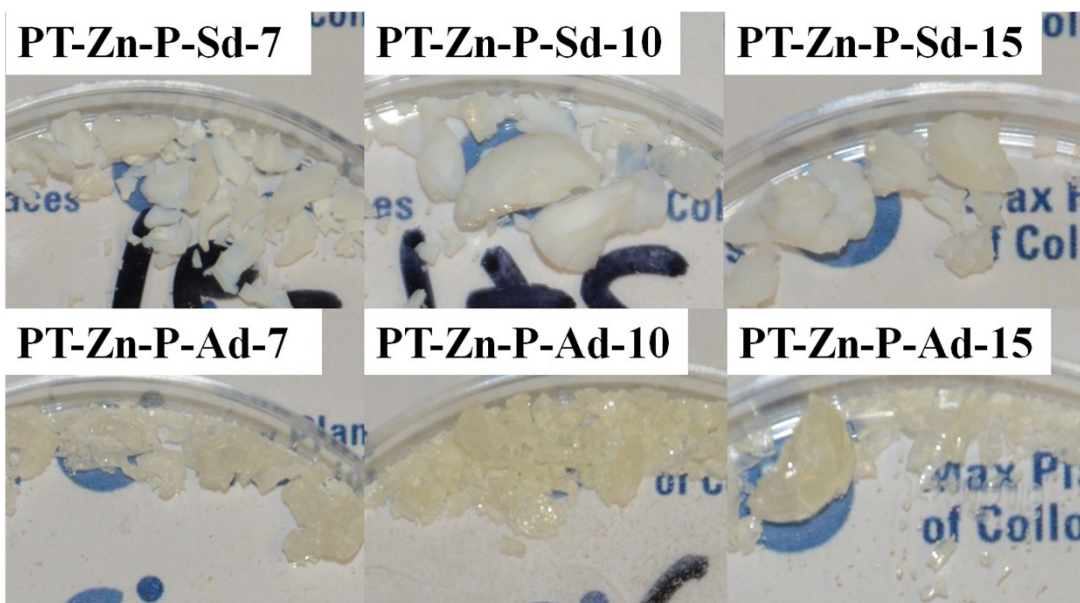

**Fig. S4.** Images of Zn-templated titania CO<sub>2</sub> supercritical dried (top) and RT ambient pressure air dried (bottom) obtained in 2-propanol.

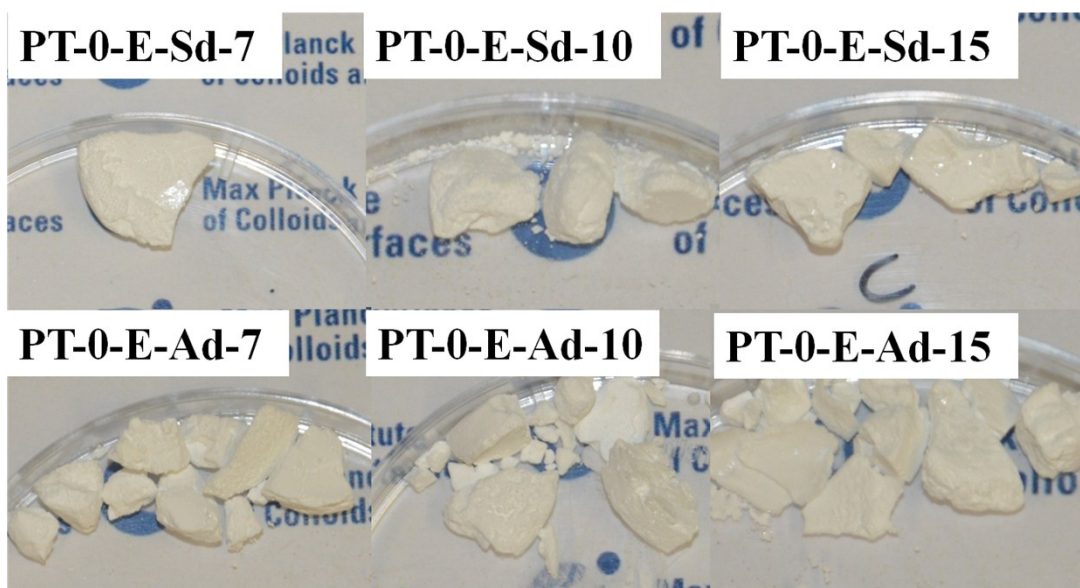

**Fig. S5.** Images of reference titania CO<sub>2</sub> supercritical dried (top) and RT ambient pressure air dried (bottom) obtained in ethanol.

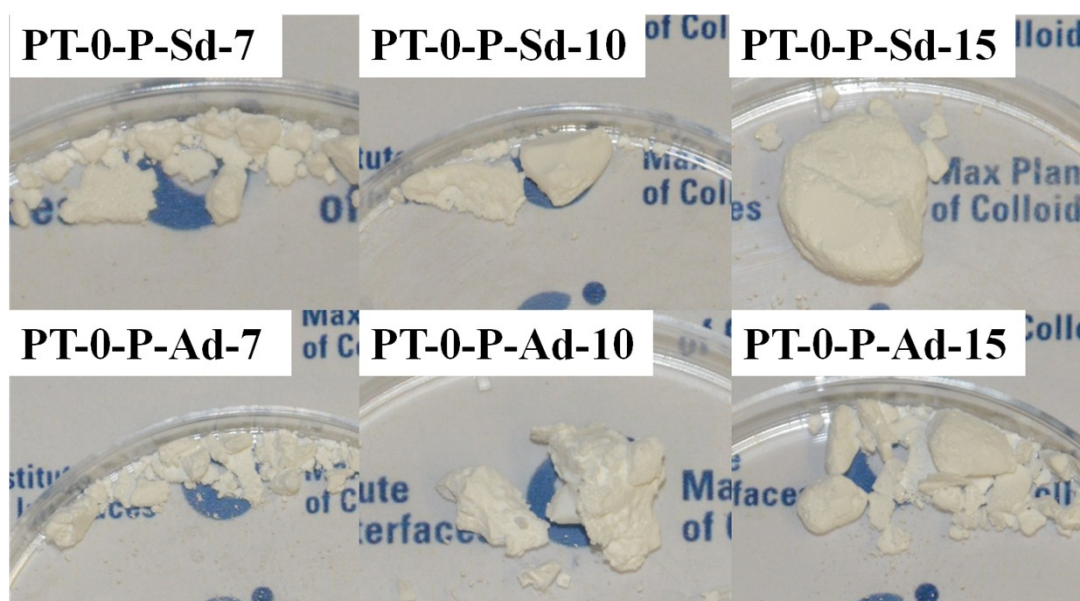

**Fig. S6.** Images of reference titania CO<sub>2</sub> supercritical dried (top) and RT ambient pressure air dried (bottom) obtained in 2-propanol.

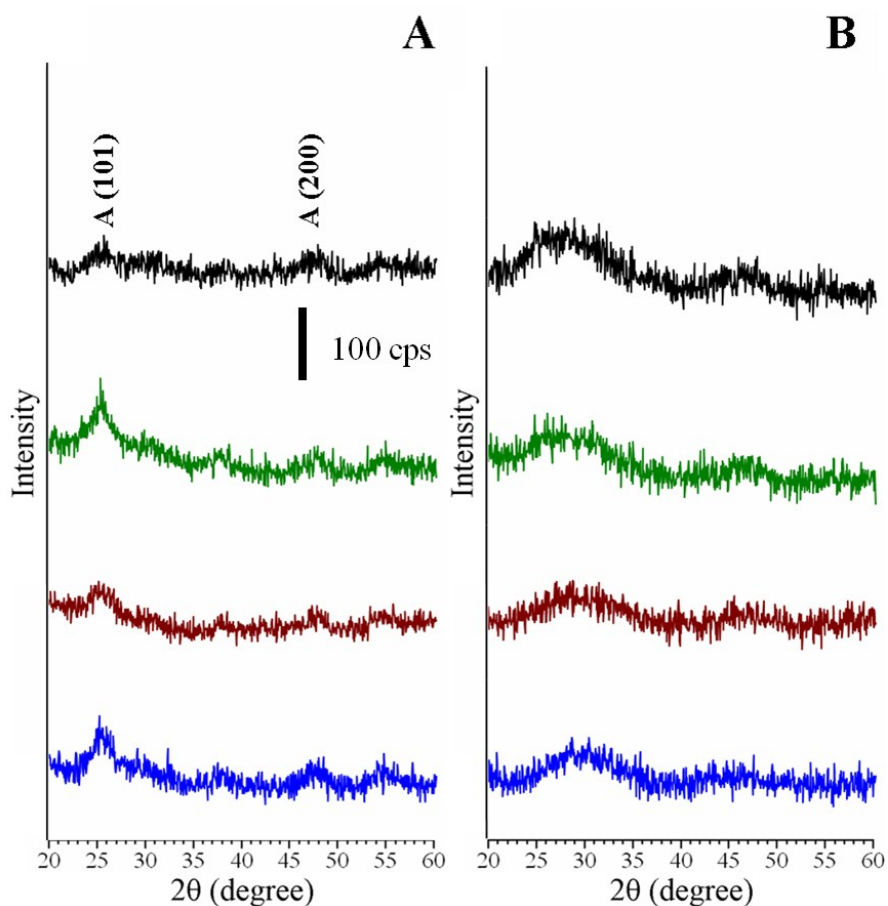

**Fig. S7.** WAXS patterns of Zn-templated (section A) and reference titania (section B)  $\text{CO}_2$  supercritical dried and RT ambient pressure air dried obtained in ethanol and 2-propanol collected after 15 days of aging time: PT-Zn-E-Sd-15 (A, blue), PT-Zn-E-Ad-15 (A, brown), PT-Zn-P-Sd-15 (A, dark green), PT-Zn-P-Ad-15 (A, black), PT-0-E-Sd-15 (B, blue), PT-0-E-Ad-15 (B, brown), PT-0-P-Sd-15 (B, dark green), PT-0-P-Ad-15 (B, black).

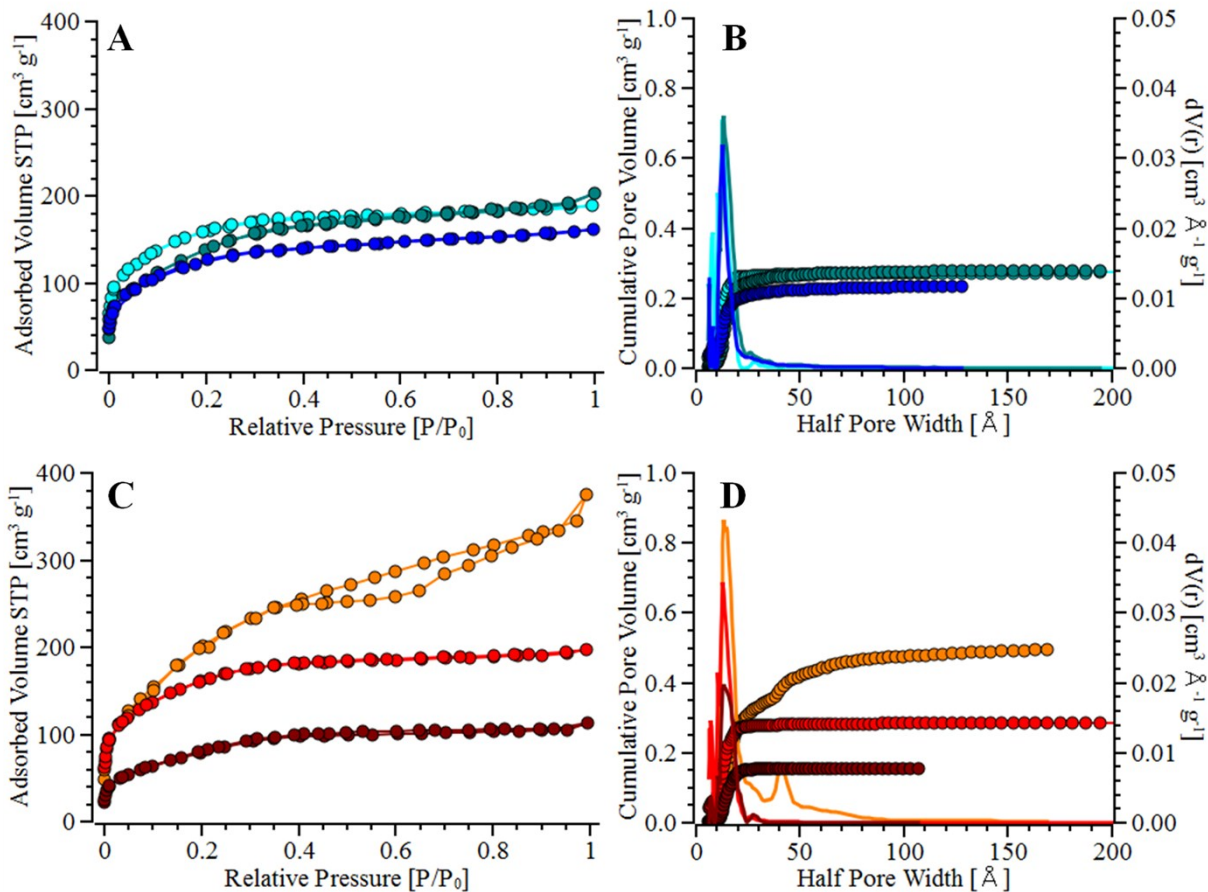

**Fig. S8.** Nitrogen sorption isotherms (left) and pore size distribution (right) of reference titania obtained in ethanol  $\text{CO}_2$  supercritical dried (A,B) and RT ambient pressure air dried (C,D) at varying aging time: PT-0-E-Sd-7 (light cyan), PT-0-E-Sd-10 (dark cyan), PT-0-E-Sd-15 (blue), PT-0-E-Ad-7 (orange), PT-0-E-Ad-10 (red), PT-0-E-Ad-15 (brown).

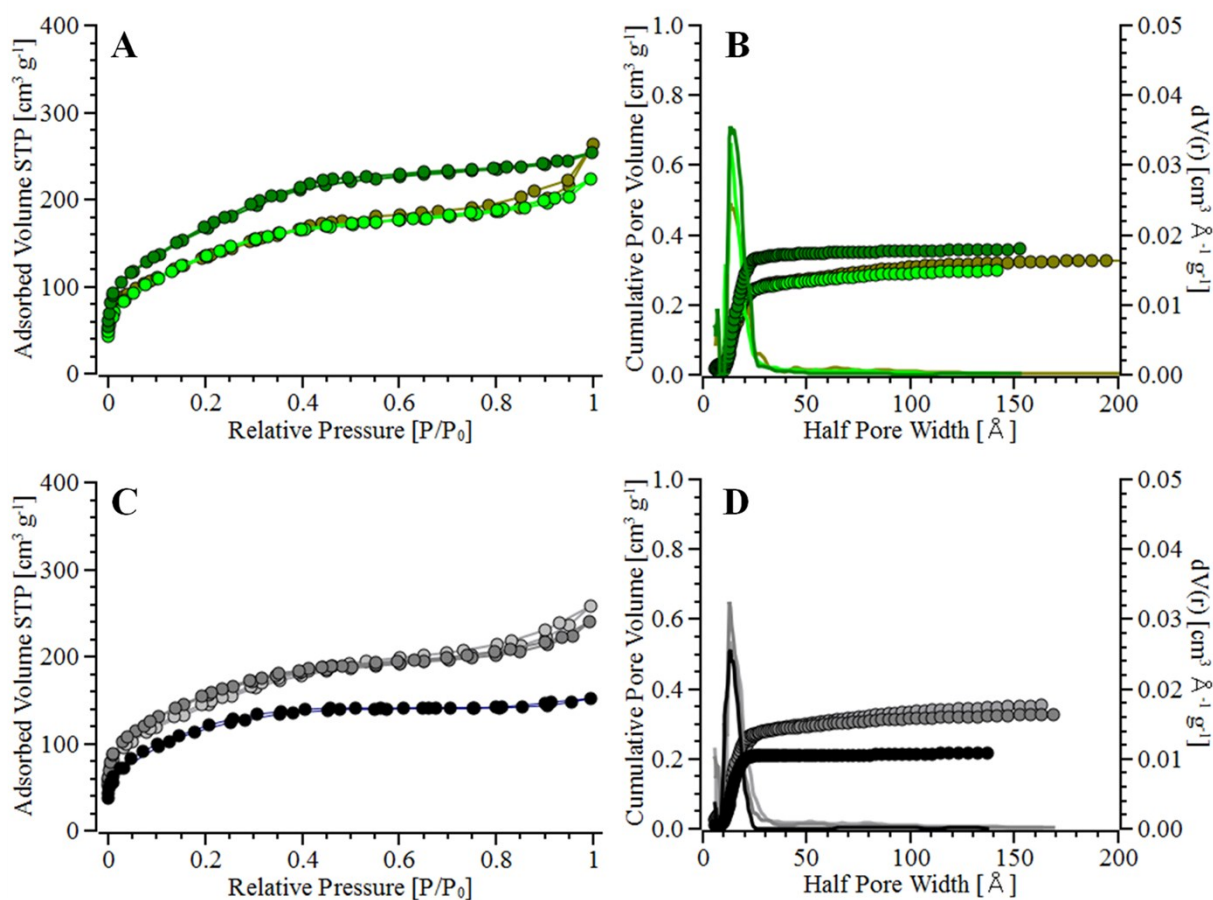

**Fig. S9.** Nitrogen sorption isotherms (left) and pore size distribution (right) of reference titania obtained in 2-propanol  $\text{CO}_2$  supercritical dried (A,B) and RT ambient pressure air dried (C,D) at varying aging time: PT-0-P-Sd-7 (dark yellow), PT-0-P-Sd-10 (light green), PT-0-P-Sd-15 (dark green), PT-0-P-Ad-7 (light grey), PT-0-P-Ad-10 (dark grey), PT-0-P-Ad-15 (black).
